# Supplementary material
Source: publisher site journal article supplement (https://www.dovepress.com/article/435415)
Supplement: Supplementary file 1 [file get_supplementary_file.php]

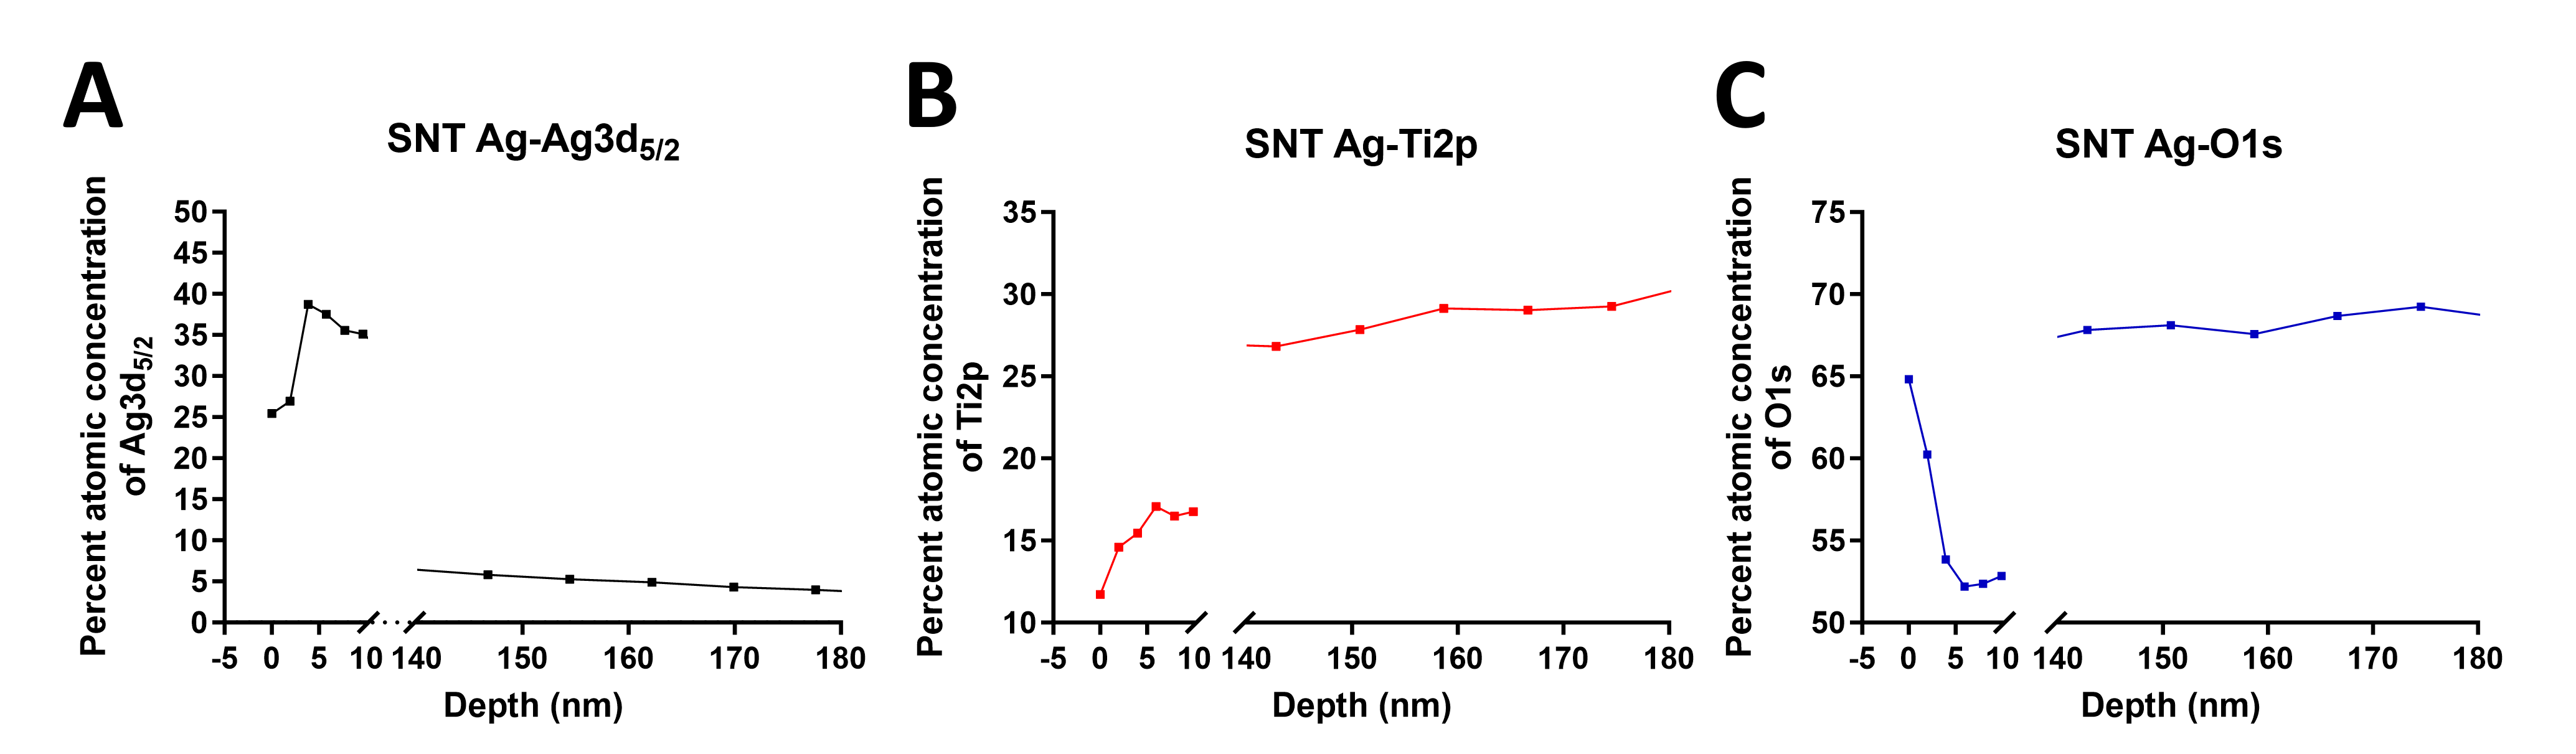


**Figure.1S** High-resolution atomic percentage of O, Ti and Ag on SNT Ag surface with depth by XPS. (A) Ag3d5/2 spectrum; (B) Ti2p spectrum; (C) O1s spectrum.


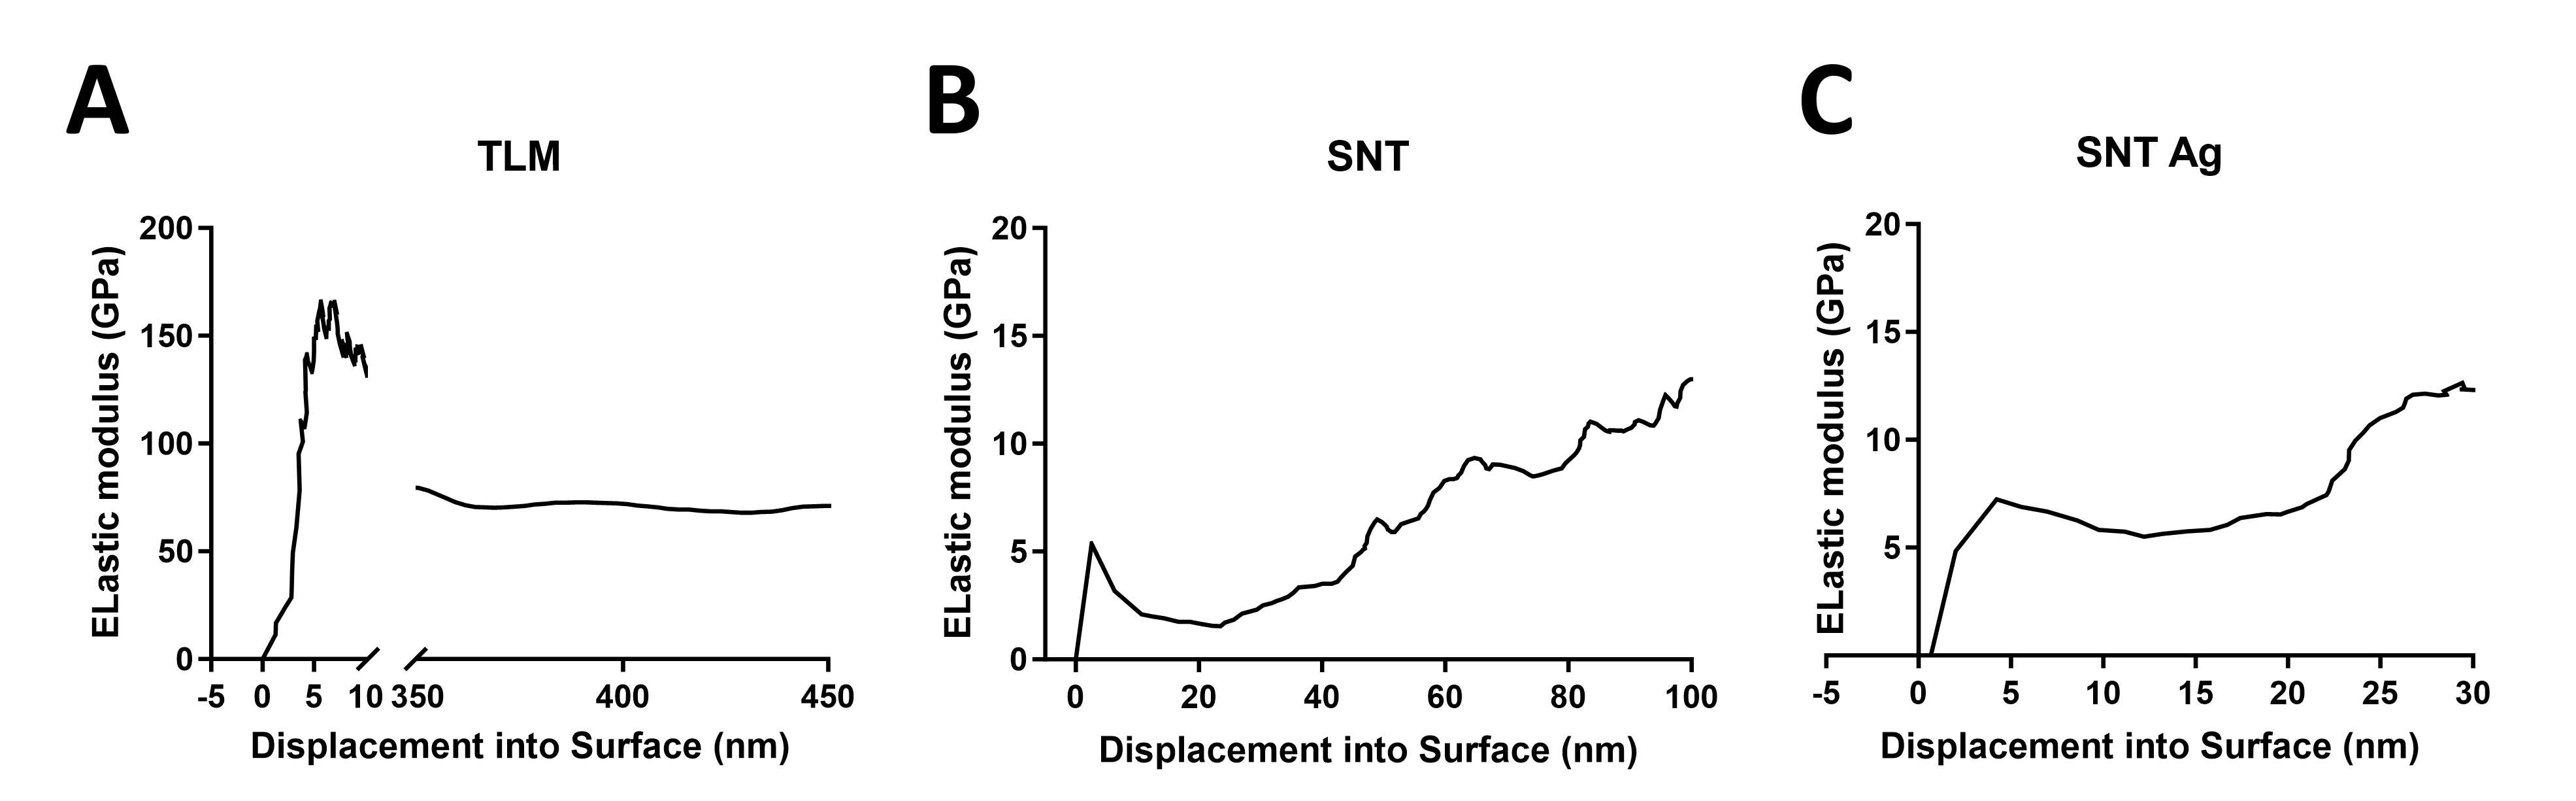


**Figure.2S** High-resolution elastic modulus on different TLM surfaces with depth by NanoIdenter.

(A) polished TLM surface; (B) SNT surface; (C) SNT Ag surface.


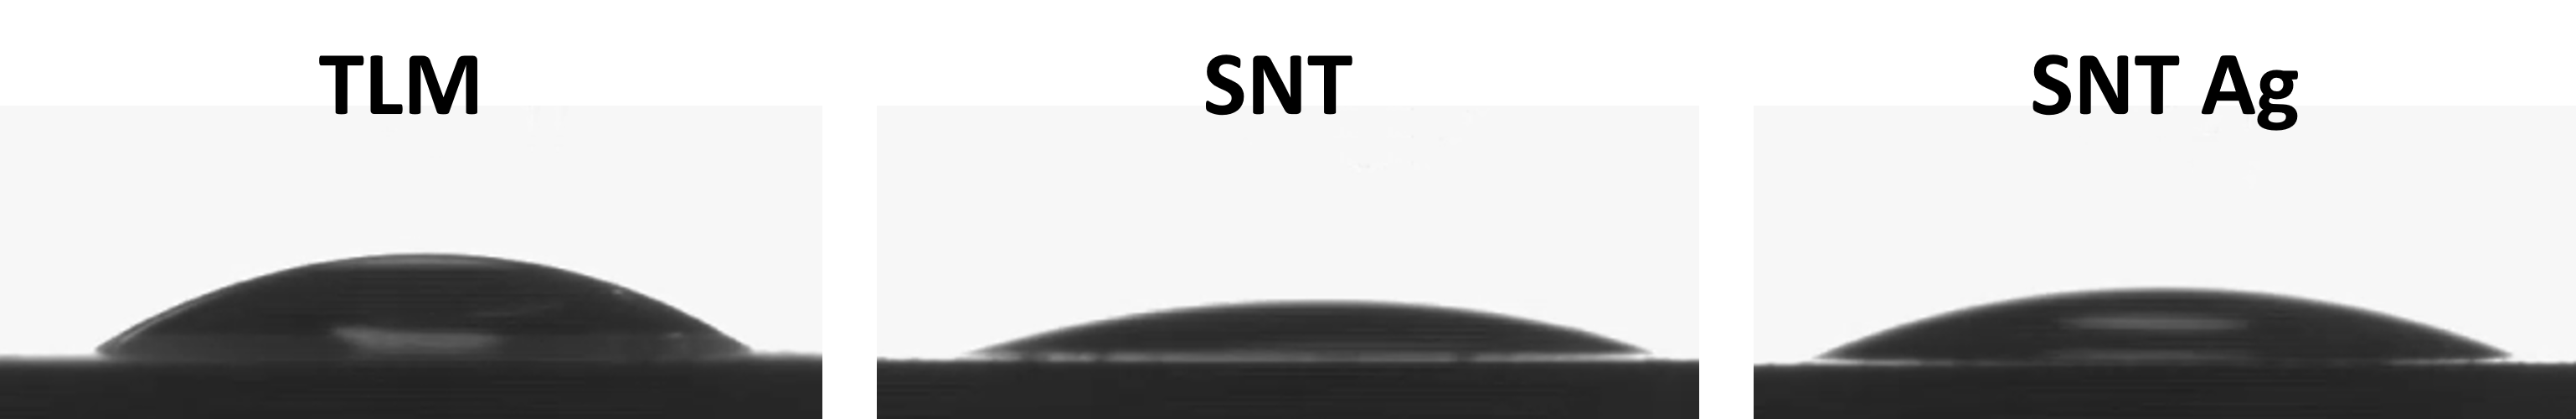


**Figure.3S** Water wettability on different TLM surfaces after 60 min incubation in culture medium with 10% FCS. Left panel, polished TLM surface; Middle panel, SNT surface; Right panel, SNT Ag surface.
